# Supplementary material for: Detection range extended 2D Ruddlesden–Popper perovskite photodetectors
Source: Royal Society of Chemistry journal article supplement (doi:10.1039/c9tc06109f), 2020-01-01
Supplement: c9tc06109f1.pdf [file c9tc06109f1.pdf]

## Supporting Information

### Detection Range Extended 2D Ruddlesden-Popper Perovskite Photodetectors

Yiyi Pan,<sup>a</sup> Haoliang Wang,<sup>b</sup> Xiaoguo Li,<sup>a</sup> Xin Zhang,<sup>c</sup> Fengcai Liu,<sup>a</sup> Meng Peng,<sup>b</sup> Zejiao Shi,<sup>a</sup> Chongyuan Li,<sup>a</sup> Haijuan Zhang,<sup>a</sup> Zhenhua Weng,<sup>a</sup> Meenakshi Gusain,<sup>a</sup> Huabao Long,<sup>d</sup> Dapeng Li,<sup>d</sup> Jiao Wang,<sup>a</sup> Yiqiang Zhan<sup>\*a</sup> and Lirong Zheng<sup>a</sup>

<sup>a</sup>Center for Micro Nano Systems, School of Information Science and Technology (SIST), Fudan University, Shanghai 200433, China. E-Mail: yqzhan@fudan.edu.cn

<sup>b</sup>State Key Laboratory of Infrared Physics, Shanghai Institute of Technical Physics, Chinese Academy of Sciences, 500 Yu Tian Road, Shanghai 200083, China.

<sup>c</sup>Academy for Engineering & Technology, Fudan University, Shanghai 200433, China

<sup>d</sup>Shanghai Aerospace Control Technology Institute, 1555 Zhong Chun Road, Shanghai 201109, China.

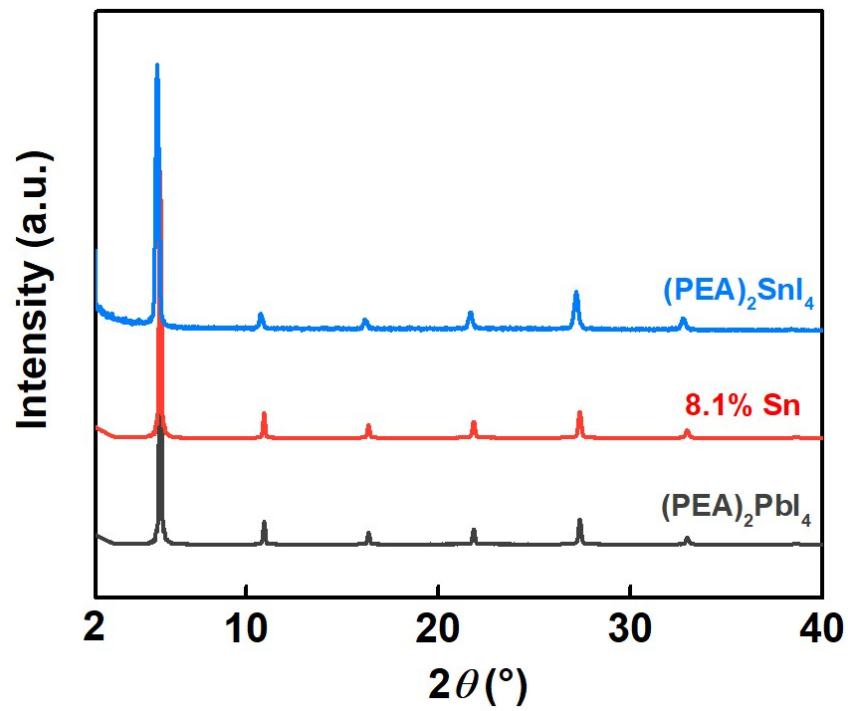

**Figure S1.** XRD patterns of (PEA)<sub>2</sub>PbI<sub>4</sub>, (PEA)<sub>2</sub>SnI<sub>4</sub> and 8.1% Sn-doped (PEA)<sub>2</sub>PbI<sub>4</sub> perovskite films.

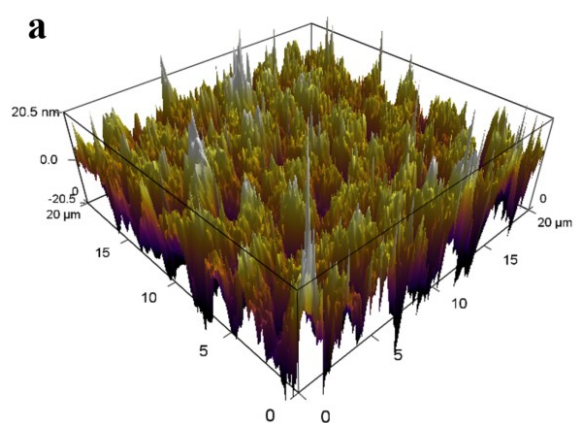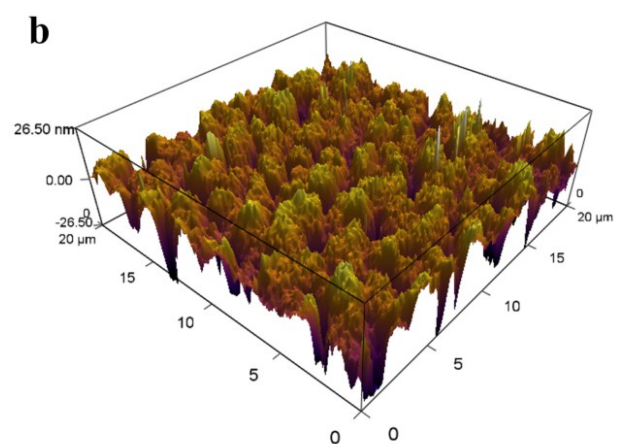

**Figure S2.** 3D AFM images of a)  $(\text{PEA})_2\text{PbI}_4$  and b) 4.2% Sn-doped  $(\text{PEA})_2\text{PbI}_4$  perovskite films show r.m.s roughness of 9.85 and 8.15 nm, respectively.

**a**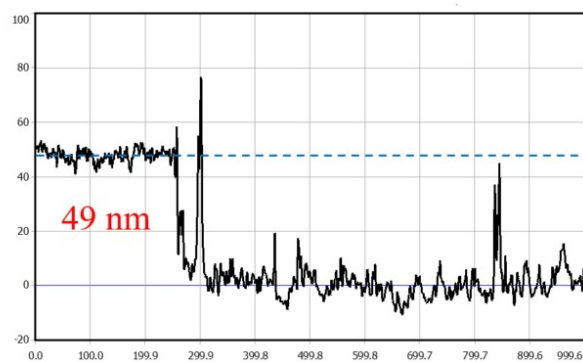**b**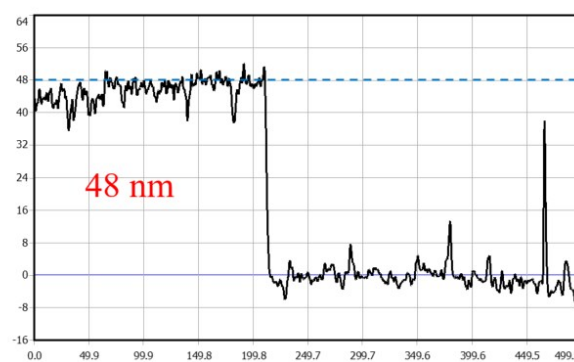

**Figure S3.** a) the thickness of 2D (PEA)<sub>2</sub>PbI<sub>4</sub> perovskite film. b) the thickness of 4.2% Sn-doped (PEA)<sub>2</sub>PbI<sub>4</sub> perovskite film.

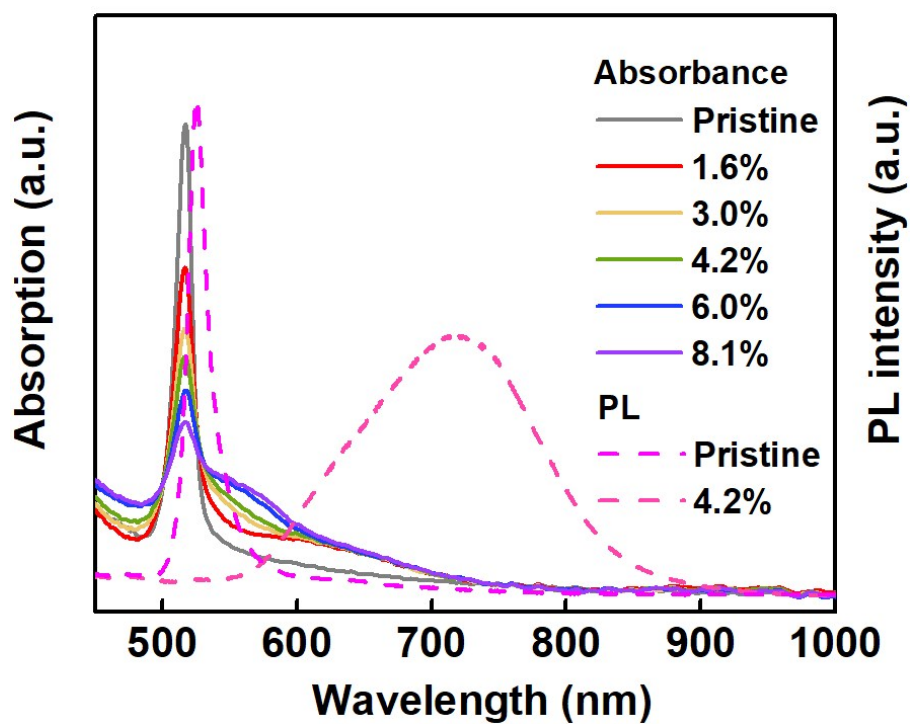

**Figure S4.** Absorbance spectra (solid line) and PL spectra (dash line) of  $(\text{PEA})_2\text{PbI}_4$  and Sn-doped  $(\text{PEA})_2\text{PbI}_4$  perovskite films with different doping concentration.

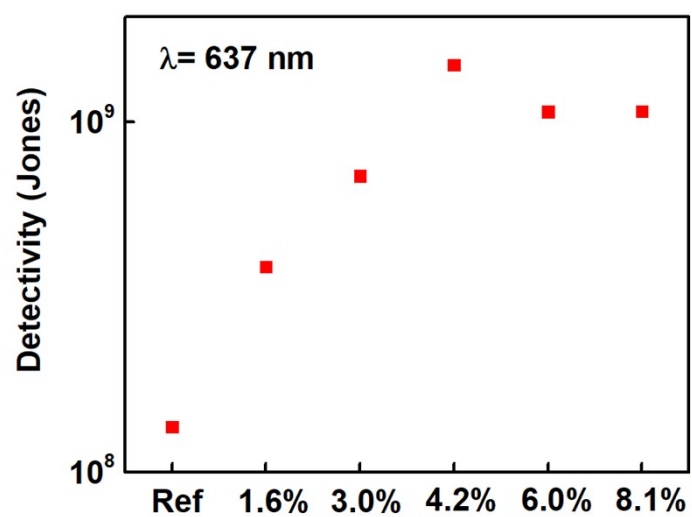

**Figure S5.** Detectivity of pristine and Sn-doped (PEA)<sub>2</sub>PbI<sub>4</sub> devices under 637 nm light illumination with irradiance power of 48.9  $\mu$ W at  $V_d$ =10 V.

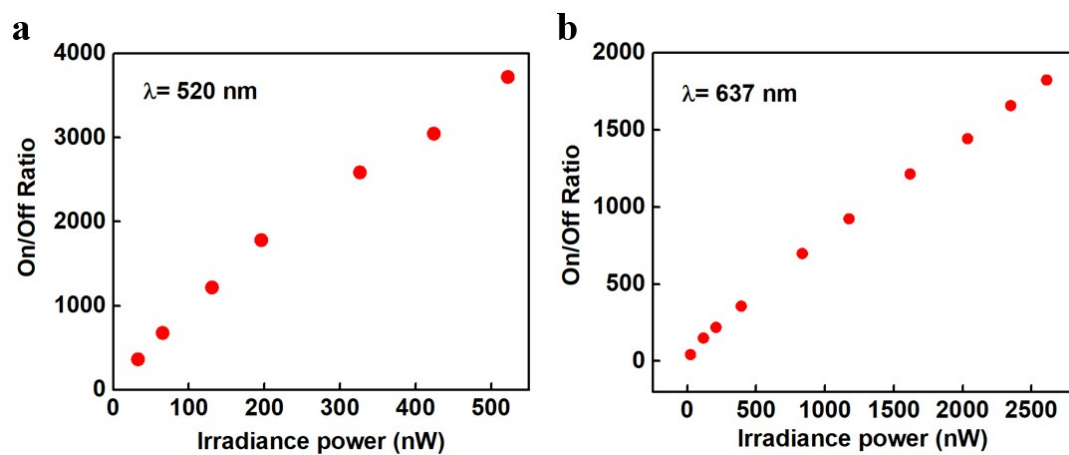

**Figure S6.** On/off ratio of the Sn-doped (PEA)<sub>2</sub>PbI<sub>4</sub> device as a function of the light power intensity. a) under 520 nm light illumination. b) under 637 nm light illumination.

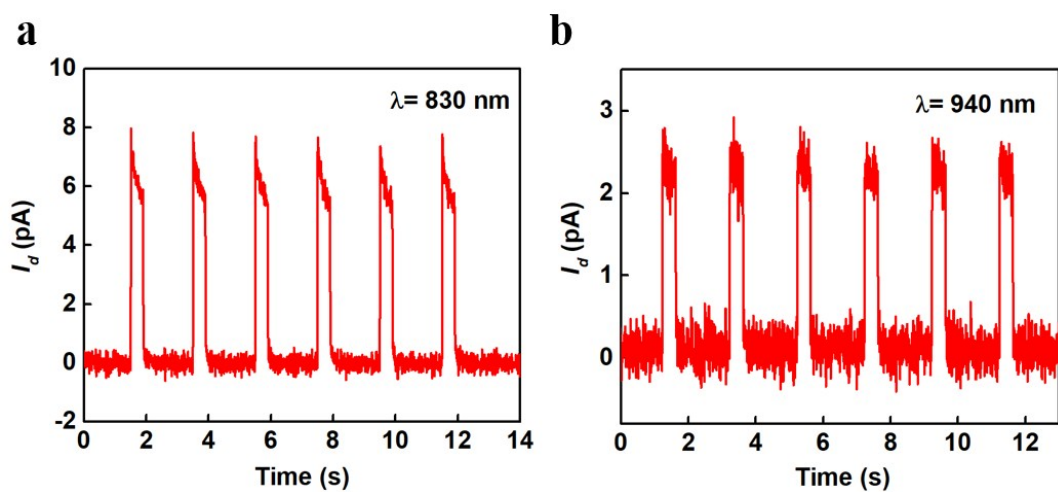

**Figure S7.** The time-dependent photocurrent measurement of 4.2% Sn-doped (PEA)<sub>2</sub>PbI<sub>4</sub> perovskite photodetectors under a) 830 nm light illumination and b) 940 nm light illumination.



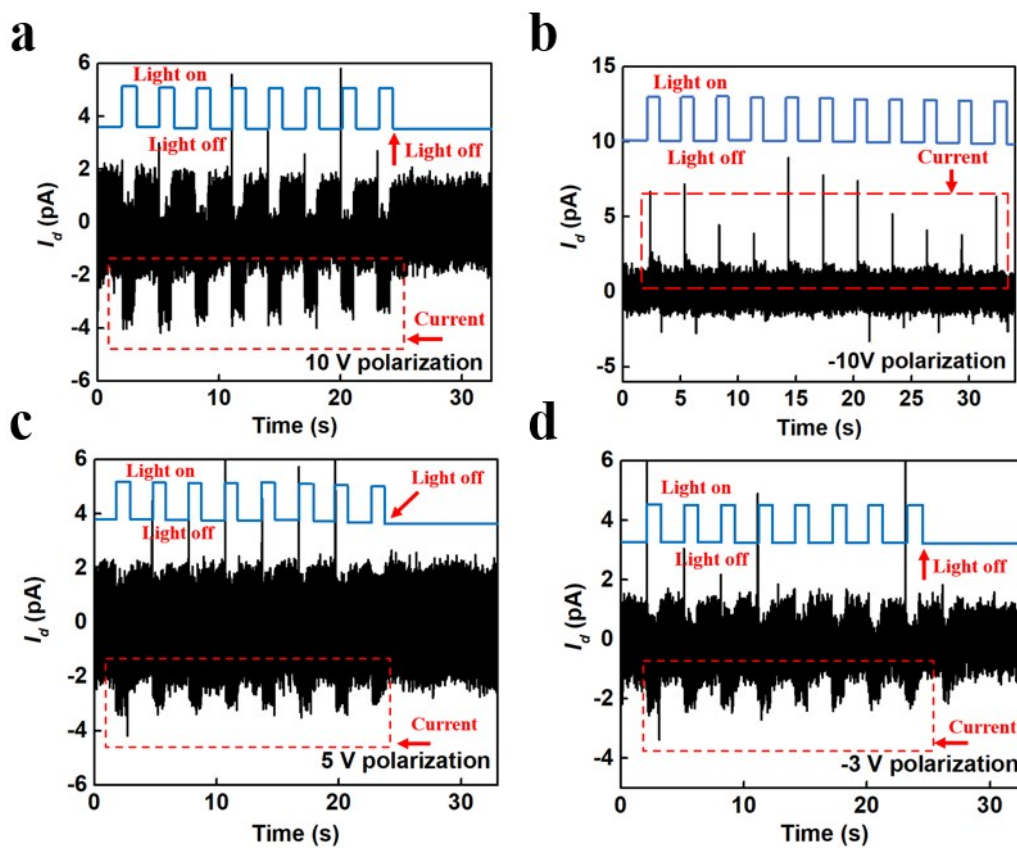

**Figure S8.** The time dependence of current of 4.2% Sn-doped (PEA)<sub>2</sub>PbI<sub>4</sub> perovskite photodetectors under 637 nm light illumination after a) 10 V b) -10 V c) 5 V and d) -3 V polarization.
